# Supplementary material for: COVID-19: an update on diagnostic and therapeutic approaches
Source: PubMed Central journal article supplement — BMB Rep. 2020 Apr 30;53(4):191–205. doi: 10.5483/BMBRep.2020.53.4.080 (PMC7196187; doi:10.5483/bmbrep.2020.53.4.080), 2020-04-30
Supplement: BMB-53-191_Supple.pdf [file BMB-53-191_Supple.pdf]

**Manuscript Type** : Mini Review

**Title** : COVID-19: An update on diagnostic and therapeutic approaches

**Author's name** :Mahalaxmi Iyer<sup>1,2</sup>, Kaavya Jayaramayya<sup>2</sup>, Mohana Devi Subramaniam<sup>1</sup>, Ssang-Goo Cho<sup>3</sup>, Balachandar Vellingiri<sup>4,\*</sup>

**Affiliation** :

<sup>1</sup>Department of Genetics and Molecular Biology, Vision Research Foundation, Chennai 600- 006, India

<sup>2</sup>Department of Zoology, Avinashilingam Institute for Home Science and Higher Education for Women, Coimbatore 641-043, India

<sup>3</sup>Department of Stem Cell and Regenerative Biotechnology, Konkuk University, Seoul 05029, South Korea

<sup>4</sup>Human Molecular Cytogenetics and Stem Cell Laboratory, Department of Human Genetics and Molecular Biology, Bharathiar University, Coimbatore 641-046, India.

**Running Title** : COVID-19 An update

**Keywords:** COVID-19; SARS-CoV-2; Current diagnostics; Convalescent plasma (CP); Chloroquine.

**Corresponding Author's Information:**

Mobile: +91 9994999924; Office: +91 422 2422514; +91 422 2422222; Fax: +91 422 2422387

E-mail: [geneticbala@buc.edu.in](mailto:geneticbala@buc.edu.in) ; [geneticbala@yahoo.co.in](mailto:geneticbala@yahoo.co.in)

**Supplement table 1: Details of the haematological parameters assessed in COVID-19**

| <b>Parameter</b>                   | <b>Study size</b> | <b>Abnormality</b> | <b>% of patients with abnormality</b> | <b>Remarks</b>                      | <b>Reference</b>       |                       |                        |
|------------------------------------|-------------------|--------------------|---------------------------------------|-------------------------------------|------------------------|-----------------------|------------------------|
| Hemoglobin                         | 85                | Decreased          | 48.2%                                 | Fatal cases                         | (Du et al., 2020)      |                       |                        |
| Hematocrit                         | 85                | Decreased          | 62.4%                                 |                                     |                        |                       |                        |
| Anaemia                            | 28                |                    | 75%                                   |                                     | (Zhang et al., 2020)   |                       |                        |
| ESR                                | 69                | >=20               | 52%                                   | Positive correlation with pneumonia | (Z. Wang et al., 2020) |                       |                        |
|                                    | 22                | Elevated           | 50%                                   |                                     |                        |                       |                        |
|                                    | 37                |                    | 46%                                   |                                     |                        |                       |                        |
|                                    | 27                |                    | 66.7%                                 |                                     |                        |                       |                        |
|                                    | 22(Paediatric)    |                    | Mean elevation                        |                                     |                        |                       |                        |
|                                    | 28                |                    | 57.1%                                 |                                     |                        |                       |                        |
|                                    | 44                |                    | 100%                                  |                                     |                        |                       |                        |
|                                    | 46 959            |                    | 42.2%                                 |                                     |                        |                       |                        |
|                                    | WBC               | 69                 | Decreased                             |                                     | 54%                    |                       | (Y. Cao et al., 2020)  |
|                                    |                   | 17                 |                                       |                                     | 52.9%                  |                       | (Z. Wang et al., 2020) |
| 37                                 |                   | 27%                |                                       |                                     | (Han et al., 2020)     |                       |                        |
| 161                                |                   |                    | 41%                                   |                                     | (Xiong et al., 2020)   |                       |                        |
| 85                                 |                   |                    | 11.8%                                 | Fatal cases                         | (ZHENG et al., 2020)   |                       |                        |
| 59 COVID                           |                   |                    | 100%                                  |                                     | (Du et al., 2020)      |                       |                        |
| 14-non pregnant                    |                   |                    |                                       |                                     | (H. Liu et al., 2020)  |                       |                        |
| 16-pregnant-Laboratory confirmed   |                   |                    |                                       | 50%                                 |                        |                       |                        |
| 25-Pregnant – clinically diagnosed |                   |                    |                                       | 64%                                 |                        |                       |                        |
| 4- Children                        |                   |                    |                                       | 25%                                 |                        |                       |                        |
| 32                                 |                   |                    |                                       | 22%                                 |                        | (W. Zhu et al., 2020) |                        |
| 29                                 |                   |                    |                                       | 79.3%                               |                        | (Chen et al., 2020)   |                        |
| 20(Paediatric)                     |                   |                    |                                       | 20%                                 |                        | (Xia et al., 2020)    |                        |
| 131                                |                   |                    | 8%                                    |                                     | (X. Li et al., 2020)   |                       |                        |
| 28                                 |                   |                    | 32.1%                                 |                                     |                        |                       |                        |
| 36 (Paediatric)                    |                   |                    | 19%                                   |                                     | (Qiu et al., 2020)     |                       |                        |

|            |                                    |                  |            |                                                                                             |                        |
|------------|------------------------------------|------------------|------------|---------------------------------------------------------------------------------------------|------------------------|
|            | 46 959                             |                  | 36.9%      |                                                                                             | (Y. Cao et al., 2020)  |
|            | 11- COVID+                         |                  |            | Count was lowered in patients with COVID-19 pneumonia as compared to non-COVID-19 pneumonia | (Cheng et al., 2020)   |
|            | 22-Controls                        |                  |            |                                                                                             |                        |
|            | 86 patients, 11 confirmed          |                  |            | Levels were lower in patients with confirmed COVID-19 as opposed to the suspected ones      | (Peng et al., 2020)    |
|            | 59 COVID                           | Leucocytosis     | -          |                                                                                             | (H. Liu et al., 2020)  |
|            | 14-non pregnant                    |                  |            |                                                                                             |                        |
|            | 16-pregnant-Laboratory confirmed   |                  | 50%        |                                                                                             |                        |
|            | 25-Pregnant – clinically diagnosed |                  | 36%        |                                                                                             |                        |
|            | 4- Children                        |                  | -          |                                                                                             |                        |
|            | 20                                 |                  | 10%        |                                                                                             | (Xia et al., 2020)     |
|            | 131                                |                  | 7%         |                                                                                             | (X. Li et al., 2020)   |
|            | 85                                 |                  | 44.7%      | Fatal cases                                                                                 | (Du et al., 2020)      |
|            | 46 959                             |                  | 11%        |                                                                                             | (Y. Cao et al., 2020)  |
| Basophil   | 85                                 | Increased        | 4.7%       | Fatal cases                                                                                 | (Du et al., 2020)      |
| Eosinophil | 69                                 | <0.02            | 72%        | Eosinophils in 31 patients was 0                                                            | (Z. Wang et al., 2020) |
|            | 14                                 | Decreased        | 85.7%      |                                                                                             | (Y. Zhu et al., 2020)  |
|            | 85                                 |                  | 81.2%      | Study including fatal cases                                                                 | (Du et al., 2020)      |
| Neutrophil | 69                                 | Decrease         | 39%        |                                                                                             | (Z. Wang et al., 2020) |
|            | 131                                |                  | 4%         |                                                                                             | (X. Li et al., 2020)   |
|            | 85                                 |                  | 12.9%      |                                                                                             | (Du et al., 2020)      |
|            | 339                                |                  | Mean level | Significant difference between people who survived and died                                 | (L. Wang et al., 2020) |
|            | 19-COVID-19                        | Elevated         | 61.11%     | Similar levels of abnormality in Pneumonia and COVID patients                               | (Zhao et al., 2020)    |
|            | 15- Pneumonia                      | neutrophil ratio |            |                                                                                             |                        |
|            | 59 COVID                           |                  | 14%        |                                                                                             | (H. Liu et al., 2020)  |

|            |                                    |                            |                                                             |                                                               |                        |
|------------|------------------------------------|----------------------------|-------------------------------------------------------------|---------------------------------------------------------------|------------------------|
| lymphocyte | 14-non pregnant                    |                            |                                                             |                                                               |                        |
|            | 16-pregnant-Laboratory confirmed   |                            | 88%                                                         |                                                               |                        |
|            | 25-Pregnant – clinically diagnosed |                            | 80%                                                         |                                                               |                        |
|            | 4- Children                        | Decreased neutrophil ratio | 50%                                                         |                                                               |                        |
|            | 32                                 | Neutrophilia               | 9%                                                          |                                                               | (W. Zhu et al., 2020)  |
|            | 131                                |                            | 13%                                                         |                                                               | (X. Li et al., 2020)   |
|            | 85                                 |                            | 60%                                                         | Fatal cases                                                   | (Du et al., 2020)      |
|            | 69                                 | <1.1                       | 42%                                                         |                                                               | (Z. Wang et al., 2020) |
|            | 59 COVID                           | Decreased                  | 79%                                                         |                                                               | (H. Liu et al., 2020)  |
|            | 14-non pregnant                    |                            |                                                             |                                                               |                        |
|            | 16-pregnant-Laboratory confirmed   |                            | 56%                                                         |                                                               |                        |
|            | 25-Pregnant – clinically diagnosed |                            | 64%                                                         |                                                               |                        |
|            | 4- Children                        | Increased                  | 50%                                                         |                                                               |                        |
|            | 32                                 | Decreased                  | 59%                                                         |                                                               | (Zhu et al., 2020)     |
|            | 29                                 |                            | 68.9%                                                       |                                                               | (Chen et al., 2020)    |
|            | 19-COVID-19                        |                            | 63.18%                                                      | Similar levels of abnormality in Pneumonia and COVID patients | (Zhao et al., 2020)    |
|            | 15- Pneumonia                      |                            |                                                             |                                                               |                        |
|            | 37                                 |                            | 51%                                                         |                                                               | (Xiong et al., 2020)   |
|            | 30                                 |                            | 80%                                                         |                                                               | (Zhou et al., 2020)    |
|            | 20(Paediatric)                     |                            | 35%                                                         |                                                               | (Xia et al., 2020)     |
| 16         |                                    | 39%                        |                                                             | (Young et al., 2020)                                          |                        |
| 161        |                                    | 26.1%                      | Decreased in severe group                                   | (ZHENG et al., 2020)                                          |                        |
| 131        |                                    | 57%                        |                                                             | (X. Li et al., 2020)                                          |                        |
| 85         |                                    | 77.6%                      | Fatal cases                                                 | (Du et al., 2020)                                             |                        |
| 339        |                                    | 63.2%                      | Significant difference between people who survived and died | (L. Wang et al., 2020)                                        |                        |

|           |                           |               |             |                                                                                             |                        |
|-----------|---------------------------|---------------|-------------|---------------------------------------------------------------------------------------------|------------------------|
|           | 102                       |               | 63.7%       | Increase in levels during hospitalization and elevation in non-survivors                    | (J. Cao et al., 2020)  |
|           | 17                        |               | 47.1%       |                                                                                             | (Han et al., 2020)     |
|           | 28                        |               | 82.1%       |                                                                                             | (Zhang et al., 2020)   |
|           | 36 (Paediatric)           |               | 31%         |                                                                                             | (Qiu et al., 2020)     |
|           | 44                        |               | 52.27%      |                                                                                             | (Yang et al., 2020)    |
|           | 15 (Pregnant)             |               | 80%         |                                                                                             | (D. Liu et al., 2020)  |
|           | 46 959                    |               | 57.4%       |                                                                                             | (Y. Cao et al., 2020)  |
|           | 56                        | Decreased     |             | Lymphocytes were decreased in elderly as compared to younger patients                       | (Xia et al., 2020)     |
| Monocytes | 20(Paediatric)            | Lymphocytosis | 15%         |                                                                                             | (K. Liu et al., 2020)  |
|           | 85                        | Increased     | 18.8%       | Fatal cases                                                                                 | (Du et al., 2020)      |
|           |                           | Decreased     | 8.2%        | Fatal cases                                                                                 | (Du et al., 2020)      |
|           | 339                       |               | Mean level  | Significant difference between people who survived and died                                 | (L. Wang et al., 2020) |
| Platelets | 449                       | Increased     | Higher mean | In comparison with non-COVID patients                                                       | (Yin et al., 2020)     |
|           | 85                        |               | 7.1%        | Fatal cases                                                                                 | (Du et al., 2020)      |
|           |                           | Decreased     | 41.2%       |                                                                                             |                        |
|           | 339                       |               | Mean level  | Significant difference between people who survived and died                                 | (L. Wang et al., 2020) |
|           | 11- COVID+<br>22-Controls | Reduced       |             | Count was lowered in patients with COVID-19 pneumonia as compared to non-COVID-19 pneumonia | (Cheng et al., 2020)   |

**Supplement table.2 Details of the biochemical parameters assessed in COVID-19**

| <b>Parameter</b> | <b>Study size</b> | <b>Abnormality</b> | <b>% of patients with abnormality</b> | <b>Remarks</b>                                                             | <b>Reference</b>       |
|------------------|-------------------|--------------------|---------------------------------------|----------------------------------------------------------------------------|------------------------|
| ALT              | 69                | >35                | 33%                                   |                                                                            | (Z. Wang et al., 2020) |
|                  | 19-COVID-19       | Increase           | 27.78%                                | Levels were higher in COVID-19 patients as compared to ones with pneumonia | (Zhao et al., 2020)    |
|                  | 15- Pneumonia     |                    |                                       |                                                                            |                        |
|                  | 85                |                    | 16.5%                                 | Fatal cases                                                                | (Du et al., 2020)      |
|                  | 102               |                    | 24.8%                                 | Increase in levels during hospitalization and elevation in non-survivors   | (J. Cao et al., 2020)  |
|                  | 44                |                    | 15.91%                                |                                                                            | (Yang et al., 2020)    |
| AST              | 69                | >40                | 28%                                   |                                                                            | (Z. Wang et al., 2020) |
|                  | 19-COVID-19       | Increase           | 27.78%                                | Levels were higher in COVID-19 patients as compared to ones with pneumonia | (Zhao et al., 2020)    |
|                  | 15- Pneumonia     |                    |                                       |                                                                            |                        |
|                  | 161               |                    | 13.7%                                 | Increased in severe group                                                  | (ZHENG et al., 2020)   |
|                  | 85                |                    | 32.9%                                 | Fatal cases                                                                | (Du et al., 2020)      |
|                  | 44                |                    | 13.64%                                |                                                                            | (Yang et al., 2020)    |
| LDH              | 69                | >245               | 41%                                   |                                                                            | (Z. Wang et al., 2020) |
|                  | 29                | Increased          | 68%                                   |                                                                            | (Chen et al., 2020)    |
|                  | 19-COVID-19       | Increased          | 31.58%                                | Levels were higher in COVID-19 patients as compared to ones with pneumonia | (Zhao et al., 2020)    |
|                  | 15- Pneumonia     |                    |                                       |                                                                            |                        |
|                  | 26                |                    | 58%                                   | Positive correlation with pneumonia                                        | (Xiong et al., 2020)   |
|                  | 161               |                    | 23.6%                                 | Increased in severe group                                                  | (ZHENG et al., 2020)   |
|                  | 85                |                    | 82.4%                                 | Fatal cases                                                                | (Du et al., 2020)      |
|                  | 28                |                    | 50%                                   |                                                                            | (Zhang et al., 2020)   |
|                  | 44                |                    | 43.18%                                |                                                                            | (Yang et al., 2020)    |
| 46 959           |                   | 57%                |                                       | (Y. Cao et al., 2020)                                                      |                        |

|                 |                      |                           |                       |                                                          |                                                         |                       |
|-----------------|----------------------|---------------------------|-----------------------|----------------------------------------------------------|---------------------------------------------------------|-----------------------|
| CRP             | 69                   | Increase                  | 67%                   |                                                          | (Z. Wang et al., 2020)                                  |                       |
|                 | 59 COVID             |                           | 50%                   |                                                          | (H. Liu et al., 2020)                                   |                       |
|                 | 14-non pregnant      |                           |                       |                                                          |                                                         |                       |
|                 | 16-pregnant-         |                           | 81%                   |                                                          |                                                         |                       |
|                 | Laboratory confirmed |                           |                       |                                                          |                                                         |                       |
|                 | 25-Pregnant –        |                           | 56%                   |                                                          |                                                         |                       |
|                 | clinically diagnosed |                           |                       |                                                          |                                                         |                       |
|                 | 4- Children          |                           | 25%                   |                                                          |                                                         |                       |
|                 | 56                   |                           |                       |                                                          | Increased in elder patients as compared to younger ones | (K. Liu et al., 2020) |
|                 | 32                   |                           | 66%                   |                                                          |                                                         | (Zhu et al., 2020)    |
|                 | 29                   |                           | 93%                   |                                                          |                                                         | (Chen et al., 2020)   |
|                 | 32                   |                           | 84%                   |                                                          | Positive correlation with pneumonia                     | (Xiong et al., 2020)  |
|                 | 27                   |                           | 100%                  |                                                          |                                                         | (Zhou et al., 2020)   |
|                 | 20 (Paediatric)      |                           | 45%                   |                                                          |                                                         | (Xia et al., 2020)    |
|                 | 16                   |                           | 38%                   |                                                          |                                                         | (Young et al., 2020)  |
| 14              | 42.8%                |                           | (Y. Zhu et al., 2020) |                                                          |                                                         |                       |
| 161             | 75.2%                | Increased in severe group | (ZHENG et al., 2020)  |                                                          |                                                         |                       |
| 22 (Paediatric) | Mean elevation       |                           | (B. Li et al., 2020)  |                                                          |                                                         |                       |
| 131             | 57%                  |                           | (X. Li et al., 2020)  |                                                          |                                                         |                       |
| 85              | 91.8%                | Fatal cases               | (Du et al., 2020)     |                                                          |                                                         |                       |
| 28              | 82.1%                |                           | (Zhang et al., 2020)  |                                                          |                                                         |                       |
| 44              | 75%                  |                           | (Yang et al., 2020)   |                                                          |                                                         |                       |
| 8 (Paediatric)  | 75%                  |                           | (Sun et al., 2020)    |                                                          |                                                         |                       |
| 46 959          | 61.3%                |                           | (Y. Cao et al., 2020) |                                                          |                                                         |                       |
| Albumin         | 29                   | Increased                 | 51.7%                 | Clinical characteristics were similar to viral pneumonia | (Chen et al., 2020)                                     |                       |
|                 | 85                   | Decreased                 | 78.8%                 | Fatal cases                                              | (Du et al., 2020)                                       |                       |
|                 | 28                   |                           | 89.3%                 |                                                          | (Zhang et al., 2020)                                    |                       |
|                 | 44                   |                           | 81.82%                |                                                          | (Yang et al., 2020)                                     |                       |

|                                                           |                              |           |        |                                                                            |                        |
|-----------------------------------------------------------|------------------------------|-----------|--------|----------------------------------------------------------------------------|------------------------|
| $\gamma$ -glutamyl transpeptidase( $\gamma$ -GT)          | 19-COVID-19<br>15- Pneumonia | Increased | 44.4%  | Levels were higher in COVID-19 patients as compared to ones with pneumonia | (Zhao et al., 2020)    |
| $\alpha$ -hydroxybutyric dehydrogenase ( $\alpha$ -HBDH). | 19-COVID-19<br>15- Pneumonia | Increased | 75%    |                                                                            |                        |
| Creatinine                                                | 20(Paediatric)               | Increased | 75%    |                                                                            | (Xia et al., 2020)     |
| Kinase MB                                                 | 85                           |           | 36.5%  | Fatal cases                                                                | (Du et al., 2020)      |
|                                                           | 36 (Paediatric)              |           | 31%    |                                                                            |                        |
| Procalcitonin                                             | 20(Paediatric)               | Increased | 80%    | Different in the paediatric cases than in the adults                       | (Xia et al., 2020)     |
|                                                           | 131                          |           | 53%    |                                                                            | (X. Li et al., 2020)   |
|                                                           | 102                          |           | 42.7%  | Increase in levels during hospitalization and elevation in non-survivors   | (J. Cao et al., 2020)  |
|                                                           | 36 (Paediatric)              |           | 17%    |                                                                            | (Qiu et al., 2020)     |
|                                                           | 44                           |           | 29.55% |                                                                            | (Yang et al., 2020)    |
|                                                           | 8 (Paediatric)               |           | 75%    |                                                                            | (Sun et al., 2020)     |
| Fibrinogen                                                | 85                           | Increased | 47.1%  | Fatal cases                                                                | (Du et al., 2020)      |
|                                                           |                              | Decreased | 22.4%  |                                                                            |                        |
| Bilirubin                                                 | 85                           | Increased | 35.3%  |                                                                            |                        |
| Blood urea nitrogen                                       | 85                           | Increased | 49.4%  |                                                                            |                        |
| SPO2                                                      | 69                           | <90%      | 20.28% |                                                                            | (Z. Wang et al., 2020) |
|                                                           | 234                          | Decrease  |        | Decreased in patients with severe condition                                | (Dai et al., 2020)     |



## References

1. Du Y, Tu L, Zhu P et al (2020) Clinical Features of 85 Fatal Cases of COVID-19 from Wuhan: A Retrospective Observational Study. *Am J Respir Crit Care Med* <https://doi.org/10.1164/rccm.202003-0543OC>
2. Zhang L, Zhu F, Xie L et al (2020) Clinical characteristics of COVID-19-infected cancer patients: A retrospective case study in three hospitals within Wuhan, China. *Ann Oncol* <https://doi.org/10.1016/j.annonc.2020.03.296>
3. Wang Z, Yang B, Li Q, Wen L and Zhang R (2020) Clinical Features of 69 Cases with Coronavirus Disease 2019 in Wuhan, China. *Clin Infect Dis* <https://doi.org/10.1093/cid/ciaa272>
4. Zhu Y, Liu YL, Li ZP et al (2020) Clinical and CT imaging features of 2019 novel coronavirus disease (COVID-19). *J Infect* <https://doi.org/10.1016/j.jinf.2020.02.022>
5. Xiong Y, Sun D, Liu Y et al (2020) Clinical and High-Resolution CT Features of the COVID-19 Infection: Comparison of the Initial and Follow-up Changes. *Invest Radiol* <https://doi.org/10.1097/RLI.0000000000000674>
6. Zhou S, Wang Y, Zhu T et al (2020) CT features of coronavirus disease 2019 (COVID-19) pneumonia in 62 patients in Wuhan, China. *Am J Roentgenol* 1–8.
7. Li B, Shen J, Li L and Yu C (2020) Radiographic and Clinical Features of Children with 2019 Novel Coronavirus (COVID-19) Pneumonia. *Indian Pediatr.*

8. Yang S, Shi Y and Lu H (2020) Clinical and CT features of early-stage patients with COVID-19: a retrospective analysis of imported cases in Shanghai, China. *Eur Respir J* <https://doi.org/10.1183/13993003.00407-2020>
9. Han X, Cao Y and Jiang N (2020) Novel Coronavirus Pneumonia (COVID-19) Progression Course in 17 Discharged Patients: Comparison of Clinical and Thin-Section CT Features During Recovery. *Clin Infect Dis* <https://doi.org/10.1093/cid/ciaa271>
10. Liu H, Liu F, Li J, Zhang T, Wang D and Lan W (2020) Clinical and CT imaging features of the COVID-19 pneumonia: Focus on pregnant women and children. *J Infect* <https://doi.org/10.1016/j.jinf.2020.03.007>
11. Zhu W, Xie K, Lu H, Xu L, Zhou S and Fang S (2020) Initial clinical features of suspected Coronavirus Disease 2019 in two emergency departments outside of Hubei, China. *J Med Virol* <https://doi.org/10.1002/jmv.25763>
12. Chen L, Liu H and Liu W (2020) Analysis of clinical features of 29 patients with 2019 novel coronavirus pneumonia. *Chin J Tuberc Respir Dis* 43, E005–E005.
13. Xia W, Shao J, Guo Y, Peng X, Li Z and Hu D (2020) Clinical and CT features in pediatric patients with COVID-19 infection: Different points from adults. *Pediatr Pulmonol* <https://doi.org/10.1002/ppul.24718>
14. Li X, Zeng W, Li Xiang et al (2020) CT imaging changes of corona virus disease 2019 (COVID-19): a multi-center study in Southwest China. *J Transl Med* 18, 1–8.
15. Qiu H, Wu J, Hong L, Luo Y, Song Q and Chen D (2020) Clinical and epidemiological features of 36 children with coronavirus disease 2019 (COVID-19) in Zhejiang, China: an observational cohort study. *Lancet Infect Dis*. [https://doi.org/10.1016/S1473-3099\(20\)30198](https://doi.org/10.1016/S1473-3099(20)30198)

16. Peng L, Liu KY, Xue F, Miao YF, Tu PA and Zhou C (2020) Improved Early Recognition of Coronavirus Disease-2019 (COVID-19): Single-Center Data from a Shanghai Screening Hospital. Arch Iran Med March 23, 272–276. <https://doi.org/10.34172/aim.2020.10>
17. Wang L, He W, Yu X et al (2020) Coronavirus Disease 2019 in elderly patients: characteristics and prognostic factors based on 4-week follow-up. J Infect <https://doi.org/10.1016/j.jinf.2020.03.019>
18. Zhao D, Yao F, Wang L et al (2020) A comparative study on the clinical features of COVID-19 pneumonia to other pneumonias. Clin Infect Dis <https://doi.org/10.1093/cid/ciaa247>
19. Liu D, Li L, Wu X et al (2020) Pregnancy and Perinatal Outcomes of Women With Coronavirus Disease (COVID-19) Pneumonia: A Preliminary Analysis. Am J Roentgenol 1–6.
20. Young BE, Ong SWX, Kalimuddin S et al (2020) Epidemiologic features and clinical course of patients infected with SARS-CoV-2 in Singapore. Jama <https://doi.org/10.1001/jama.2020.3204>
21. Liu K, Chen Y, Lin R and Han K (2020) Clinical features of COVID-19 in elderly patients: A comparison with young and middle-aged patients. J Infect <https://doi.org/10.1016/j.jinf.2020.03.005>
22. Yin S, Huang M, Li D and Tang N (2020) Difference of coagulation features between severe pneumonia induced by SARS-CoV2 and non-SARS-CoV2. J Thromb. Thrombolysis <https://doi.org/10.1007/s11239-020-02105-8>
23. Sun D, Li H and Lu XX (2020) Clinical features of severe pediatric patients with coronavirus disease 2019 in Wuhan: a single center’s observational study. World J Pediatr 1–9.

24. Dai H, Zhang X, Xia J et al (2020) High-resolution Chest CT Features and Clinical Characteristics of Patients Infected with COVID-19 in Jiangsu, China. *Int J Infect Dis* <https://doi.org/10.1016/j.ijid.2020.04.003>
